# Supplementary material for: Improved Estimation of Protein-Ligand Binding Free Energy by Using the Ligand-Entropy and Mobility of Water Molecules
Source: PubMed Central journal article supplement (PMC3817721; doi:10.3390/ph6050604), 2013-04-26
Supplement: pharmaceuticals-06-00604-s001.pdf [file pharmaceuticals-06-00604-s001.pdf]

**Supplementary data: Estimated binding free energies by several models and the experimental value ( $\Delta G_{exptl}$ )**

| PDB ID | $\Delta G_{exptl}$ | $\Delta G_{DIAV}$<br>(eq. 1) | $\Delta G_{DIAS}$<br>(eq. 3) | $\Delta G_{DIAV\_L}$<br>(eq. 9) | $\Delta G_{DIAV\_W}$<br>(eq. 10) | $\Delta G_{DIAV\_LW}$<br>(eq. 11) | $\Delta G_{DIAV\_LC}$<br>(eq. 11) | PRO_LEADS <sup>a</sup> | PSI-DOCK <sup>b</sup> | Sievgene <sup>c</sup> |
|--------|--------------------|------------------------------|------------------------------|---------------------------------|----------------------------------|-----------------------------------|-----------------------------------|------------------------|-----------------------|-----------------------|
| 1abf   | -7.39              | -6.44                        | -7.46                        | -7.33                           | -6.35                            | -7.16                             | -7.68                             | -7.83                  | -8.34                 | -9.19                 |
| 1apu   | -10.50             | -9.70                        | -10.70                       | -9.00                           | -9.70                            | -9.30                             | -10.45                            | -8.83                  | -9.88                 | -10.21                |
| 1dbb   | -12.27             | -11.89                       | -11.25                       | -12.08                          | -11.67                           | -13.09                            | -12.80                            | -9.79                  | -10.50                | -7.91                 |
| 1dbj   | -10.47             | -11.28                       | -10.39                       | -11.35                          | -11.07                           | -9.24                             | -9.19                             | -10.01                 | -10.83                | -9.41                 |
| 1dog   | -5.48              | -6.45                        | -8.58                        | -8.00                           | -6.38                            | -8.28                             | -8.64                             | -7.22                  | -8.68                 | -7.45                 |
| 1dwb   | -3.98              | -5.04                        | -5.16                        | -5.24                           | -4.92                            | -5.57                             | -5.65                             | -5.33                  | -5.97                 | -5.09                 |
| 1epo   | -10.85             | -12.49                       | -12.35                       | -13.13                          | -12.53                           | -10.79                            | -10.85                            | -11.32                 | -9.40                 | -13.26                |
| 1etr   | -10.09             | -10.95                       | -9.86                        | -9.90                           | -10.87                           | -10.38                            | -10.23                            | -9.92                  | -10.91                | -11.01                |
| 1ets   | -11.62             | -10.75                       | -10.21                       | -10.48                          | -10.62                           | -10.43                            | -9.51                             | -11.25                 | -11.07                | -13.11                |
| 1ett   | -8.44              | -12.04                       | -10.87                       | -10.42                          | -11.76                           | -8.44                             | -10.53                            | -8.31                  | -9.96                 | -10.87                |
| 1hpv   | -12.57             | -13.29                       | -13.32                       | -12.78                          | -13.33                           | -12.22                            | -13.15                            | -9.75                  | -9.53                 | -13.38                |
| 1hsl   | -9.96              | -6.79                        | -7.86                        | -7.26                           | -6.74                            | -5.43                             | -7.74                             | -7.47                  | -7.61                 | -8.30                 |
| 1htf   | -11.04             | -12.10                       | -10.45                       | -11.48                          | -12.13                           | -11.19                            | -11.97                            | -11.74                 | -10.92                | -12.15                |
| 1hvr   | -12.97             | -15.58                       | -14.97                       | -15.33                          | -15.63                           | -14.42                            | -15.18                            | -15.22                 | -12.49                | -17.47                |
| 1nsd   | -7.23              | -8.76                        | -9.21                        | -9.19                           | -8.65                            | -10.07                            | -9.92                             | -7.02                  | -7.88                 | -11.68                |
| 1pgp   | -7.77              | -9.81                        | -9.10                        | -8.99                           | -9.56                            | -6.98                             | -8.00                             | -5.55                  | -8.48                 | -7.54                 |
| 1phg   | -11.81             | -9.63                        | -9.57                        | -10.59                          | -9.53                            | -9.58                             | -11.04                            | -9.11                  | -7.51                 | -8.12                 |
| 1ppc   | -8.80              | -9.09                        | -8.55                        | -9.44                           | -9.10                            | -8.40                             | -9.56                             | -9.43                  | -7.87                 | -11.00                |
| 1pph   | -8.49              | -7.83                        | -7.46                        | -8.13                           | -7.81                            | -7.63                             | -8.51                             | -8.90                  | -6.25                 | -8.98                 |
| 1rbp   | -9.17              | -9.10                        | -9.62                        | -9.74                           | -9.11                            | -9.04                             | -9.76                             | -10.37                 | -11.83                | -10.35                |
| 1tng   | -4.00              | -5.03                        | -5.39                        | -5.48                           | -4.98                            | -4.82                             | -2.64                             | -5.32                  | -5.12                 | -5.05                 |

|                                  |        |        |        |        |        |        |        |        |        |        |
|----------------------------------|--------|--------|--------|--------|--------|--------|--------|--------|--------|--------|
| 1tnh                             | -4.59  | -4.89  | -5.53  | -5.26  | -4.83  | -4.78  | -5.52  | -5.14  | -5.11  | -5.15  |
| 1ulb                             | -7.23  | -6.18  | -5.90  | -6.06  | -5.99  | -6.10  | -6.25  | -5.25  | -7.28  | -5.46  |
| 2cgr                             | -9.92  | -12.21 | -11.20 | -11.16 | -11.99 | -11.19 | -8.41  | -8.62  | -9.36  | -10.57 |
| 2gbp                             | -10.36 | -7.55  | -9.23  | -8.63  | -7.45  | -10.09 | -9.37  | -8.91  | -9.05  | -9.46  |
| 2ifb                             | -7.41  | -8.13  | -7.89  | -7.08  | -8.15  | -8.63  | -7.48  | -10.41 | -9.89  | -8.41  |
| 2phh                             | -6.38  | -7.04  | -7.57  | -7.31  | -6.83  | -8.47  | -7.95  | -7.68  | -7.47  | -6.35  |
| 2r04                             | -8.48  | -10.72 | -10.58 | -10.29 | -10.71 | -12.11 | -10.48 | -10.34 | -11.71 | -10.55 |
| 2tsc                             | -11.62 | -8.63  | -9.97  | -8.90  | -8.75  | -9.76  | -8.09  | -8.25  | -10.10 | -9.38  |
| 2ypi                             | -6.58  | -5.87  | -6.53  | -6.20  | -5.76  | -7.16  | -6.64  | -5.41  | -7.23  | -5.59  |
| 3ptb                             | -6.46  | -4.17  | -4.75  | -4.75  | -4.12  | -5.59  | -5.11  | -6.17  | -5.82  | -5.56  |
| 4dfr                             | -13.23 | -8.35  | -7.96  | -8.16  | -8.36  | -9.25  | -8.14  | -9.39  | -9.65  | -12.03 |
| 5abp                             | -9.05  | -6.86  | -8.12  | -7.46  | -6.77  | -8.87  | -8.21  | -7.80  | -8.68  | -9.67  |
| Average Error                    |        | 1.58   | 1.36   | 1.39   | 1.48   | 1.26   | 1.31   | 1.44   | 1.45   | 1.58   |
| SD                               |        | 1.88   | 1.66   | 1.68   | 1.86   | 1.70   | 1.72   | 1.76   | 1.82   | 1.97   |
| Correlation coefficient          |        | 0.59   | 0.75   | 0.76   | 0.76   | 0.75   | 0.75   | 0.74   | 0.70   | 0.75   |
| Average Error (MLR) <sup>a</sup> |        | 1.42   | 1.23   | 1.23   | 1.32   | 1.13   | 1.17   | 1.44   | 1.45   | 1.58   |

a: Reference 6.

b: Pei, J.; Liu, Z.; Li, Q.; Yang, K.; Lai, L. PSI-DOCK: Towards highly efficient and accurate flexible ligand docking. *PROTEINS*. **2006**, 62, 934-946.

c: Reference 7.

The estimated values by PRO\_LEADS, PSI-DOCK and sievgene are fitted values, while the values by the DIA methods are the cross validation test results.
